# Supplementary material for: Contribution of MicroRNA‐27b‐3p to Synovial Fibrotic Responses in Knee Osteoarthritis
Source: PubMed Central journal article supplement — Arthritis Rheumatol. 2022 Nov 11;74(12):1928–42. doi: 10.1002/art.42285 (PMC10946865; doi:10.1002/art.42285), 2022-11-11
Supplement: ART-74-1928-s006.pdf [file ART-74-1928-s006.pdf]

**Supplementary Table 3.** Genes significantly upregulated or downregulated ( $p < 0.05$ ), or not significantly changed ( $p > 0.05$ ) by miR-27b-3p mimic-treated compared to control mimic-treated OA FLS, as determined by RT-qPCR array. Genes undetected by array analysis are also indicated.

| <b>Genes Significantly Upregulated (<math>p &lt; 0.05</math>)</b>   |                                                                                              |                |
|---------------------------------------------------------------------|----------------------------------------------------------------------------------------------|----------------|
| <b>Symbol</b>                                                       | <b>Complete name</b>                                                                         | <b>p-value</b> |
| ADAMTS8                                                             | ADAM metalloproteinase with thrombospondin type 1 motif, 8                                   | 0.0345         |
| COL14A1                                                             | Collagen, type XIV, alpha 1                                                                  | 0.0271         |
| COL1A1                                                              | Collagen, type I, alpha 1                                                                    | <0.0001        |
| COL5A1                                                              | Collagen, type V, alpha 1                                                                    | 0.0008         |
| FN1                                                                 | Fibronectin 1                                                                                | 0.0149         |
| THBS1                                                               | Thrombospondin 1                                                                             | 0.018          |
| TNC                                                                 | Tenascin C                                                                                   | 0.036          |
| <b>Genes Significantly Downregulated (<math>p &lt; 0.05</math>)</b> |                                                                                              |                |
| <b>Symbol</b>                                                       | <b>Complete name</b>                                                                         | <b>p-value</b> |
| CTNND1                                                              | Catenin ( cadherin-associated protein), delta 1                                              | 0.0046         |
| HAS1                                                                | Hyaluronan synthase 1                                                                        | 0.0225         |
| ITGA2                                                               | Integrin, alpha 2 (CD49B, alpha 2 subunit of VLA-2 receptor)                                 | 0.0241         |
| <b>Genes Not Significantly Changed (<math>p &gt; 0.05</math>)</b>   |                                                                                              |                |
| <b>Symbol</b>                                                       | <b>Complete name</b>                                                                         |                |
| ADAMTS13                                                            | ADAM metalloproteinase with thrombospondin type 1 motif, 13                                  |                |
| ADAMTS1                                                             | ADAM metalloproteinase with thrombospondin type 1 motif, 1                                   |                |
| CD44                                                                | CD44 molecule (Indian blood group)                                                           |                |
| CLEC3B                                                              | C-type lectin domain family 3, member B                                                      |                |
| COL12A1                                                             | Collagen, type XII, alpha 1                                                                  |                |
| COL15A1                                                             | Collagen, type X V, alpha 1                                                                  |                |
| COL16A1                                                             | Collagen, type X VI, alpha 1                                                                 |                |
| COL4A2                                                              | Collagen, type IV, alpha 2                                                                   |                |
| COL6A2                                                              | Collagen, type VI, alpha 2                                                                   |                |
| COL6A1                                                              | Collagen, type VI, alpha 1                                                                   |                |
| COL7A1                                                              | Collagen, type VII, alpha 1                                                                  |                |
| COL8A1                                                              | Collagen, type VIII, alpha 1                                                                 |                |
| CTGF                                                                | Connective tissue growth factor                                                              |                |
| CTNNA1                                                              | Catenin ( cadherin-associated protein), alpha 1, 102kDa                                      |                |
| CTNNB1                                                              | Catenin ( cadherin-associated protein), beta 1, 88kDa                                        |                |
| ECM1                                                                | Extracellular matrix protein 1                                                               |                |
| ICAM1                                                               | Intercellular adhesion molecule 1                                                            |                |
| ITGA3                                                               | Integrin, alpha 3 (antigen CD49C, alpha 3 subunit of VLA-3 receptor)                         |                |
| ITGA4                                                               | Integrin, alpha 4 (antigen CD49D, alpha 4 subunit of VLA-4 receptor)                         |                |
| ITGA5                                                               | Integrin, alpha 5 (fibronectin receptor, alpha polypeptide)                                  |                |
| ITGA6                                                               | Integrin, alpha 6                                                                            |                |
| ITGA7                                                               | Integrin, alpha 7                                                                            |                |
| ITGA1                                                               | Integrin, alpha 1                                                                            |                |
| ITGAV                                                               | Integrin, alpha V (vitronectin receptor, alpha polypeptide, antigen CD51)                    |                |
| ITGB2                                                               | Integrin, beta 2 (complement component 3 receptor 3 and 4 subunit)                           |                |
| ITGB3                                                               | Integrin, beta 3 (platelet glycoprotein IIIa, antigen CD61)                                  |                |
| ITGB5                                                               | Integrin, beta 5                                                                             |                |
| ITGB1                                                               | Integrin, beta 1 (fibronectin receptor, beta polypeptide, antigen CD29 includes MDF2, MSK12) |                |
| LAMA2                                                               | Laminin, alpha 2                                                                             |                |
| LAMA3                                                               | Laminin, alpha 3                                                                             |                |
| LAMA1                                                               | Laminin, alpha 1                                                                             |                |
| LAMB3                                                               | Laminin, beta 3                                                                              |                |
| LAMB1                                                               | Laminin, beta 1                                                                              |                |
| LAMC1                                                               | Laminin, gamma 1 (formerly LAMB2)                                                            |                |
| MMP10                                                               | Matrix metalloproteinase 10 (stromelysin 2)                                                  |                |
| MMP14                                                               | Matrix metalloproteinase 14 (membrane-inserted)                                              |                |
| MMP15                                                               | Matrix metalloproteinase 15 (membrane-inserted)                                              |                |
| MMP16                                                               | Matrix metalloproteinase 16 (membrane-inserted)                                              |                |
| MMP2                                                                | Matrix metalloproteinase 2 (gelatinase A, 72kDa gelatinase, 72kDa type IV collagenase)       |                |
| MMP3                                                                | Matrix metalloproteinase 3 (stromelysin 1, progelatinase)                                    |                |
| MMP9                                                                | Matrix metalloproteinase 9 (gelatinase B, 92kDa gelatinase, 92kDa type IV collagenase)       |                |
| MMP1                                                                | Matrix metalloproteinase 1 (interstitial collagenase)                                        |                |
| MMP11                                                               | Matrix metalloproteinase 11 (stromelysin 3)                                                  |                |
| PCAM1                                                               | Platelet/endothelial cell adhesion molecule                                                  |                |
| SGCE                                                                | Sarcoglycan, epsilon                                                                         |                |
| SPARC                                                               | Secreted protein, acidic, cysteine-rich ( osteonectin)                                       |                |
| SPG7                                                                | Spastic paraplegia 7 (pure and complicated autosomal recessive)                              |                |
| SPPI                                                                | Secreted phosphoprotein 1                                                                    |                |
| TGFB1                                                               | Transforming growth factor, beta-induced, 68kDa                                              |                |

|                         |                                                                                                       |
|-------------------------|-------------------------------------------------------------------------------------------------------|
| THBS2                   | Thrombospondin 2                                                                                      |
| THBS3                   | Thrombospondin 3                                                                                      |
| TIPM2                   | TIMP metalloproteinase inhibitor 2                                                                    |
| TIPM3                   | TIMP metalloproteinase inhibitor 3                                                                    |
| TIPM1                   | TIMP metalloproteinase inhibitor 1                                                                    |
| VCAM1                   | Vascular cell adhesion molecule 1                                                                     |
| VCAN                    | Versican                                                                                              |
| VTN                     | Vitronectin                                                                                           |
| <b>Genes Undetected</b> |                                                                                                       |
| <b>Symbol</b>           | <b>Complete name</b>                                                                                  |
| ANOS1                   | Anosmin-1, (KALI) Kallmann syndrome 1 sequence                                                        |
| CDH1                    | Cadherin 1, type 1, E-cadherin ( epithelial)                                                          |
| CNTN1                   | Contactin 1                                                                                           |
| COL11A1                 | Collagen, type XI, alpha 1                                                                            |
| CTNND2                  | Catenin ( cadherin-associated protein), delta 2 (neural plakophilin-related arm-repeat protein)       |
| ITGA8                   | Integrin, alpha 8                                                                                     |
| ITGAL                   | Integrin, alpha L (antigen CD11A (p180), lymphocyte function-associated antigen 1; alpha polypeptide) |
| ITGAM                   | Integrin, alpha M ( complement component 3 receptor 3 subunit)                                        |
| ITGB4                   | Integrin, beta 4                                                                                      |
| MMP12                   | Matrix metalloproteinase 12 (macrophage elastase)                                                     |
| MMP13                   | Matrix metalloproteinase 13 ( collagenase 3)                                                          |
| MMP7                    | Matrix metalloproteinase 7 (matrilysin, uterine)                                                      |
| MMP8                    | Matrix metalloproteinase 8 (neutrophil collagenase)                                                   |
| NCAM1                   | Neural cell adhesion molecule 1                                                                       |
| SELE                    | Selectin E                                                                                            |
| SELL                    | Selectin L                                                                                            |
| SELP                    | Selectin P (granule membrane protein 140kDa, antigen CD62)                                            |
