# Supplementary material for: Contribution of MicroRNA‐27b‐3p to Synovial Fibrotic Responses in Knee Osteoarthritis
Source: PubMed Central journal article supplement — Arthritis Rheumatol. 2022 Nov 11;74(12):1928–42. doi: 10.1002/art.42285 (PMC10946865; doi:10.1002/art.42285), 2022-11-11
Supplement: ART-74-1928-s009.pdf [file ART-74-1928-s009.pdf]

DMM + Ctrl I

DMM + Inh

Negative Ctrl

Tibial Plateau

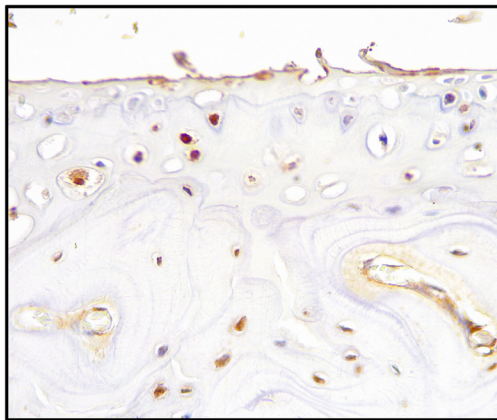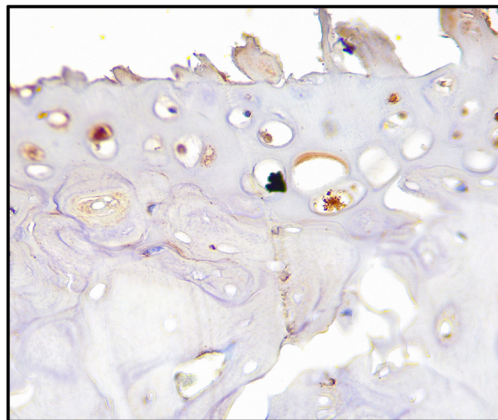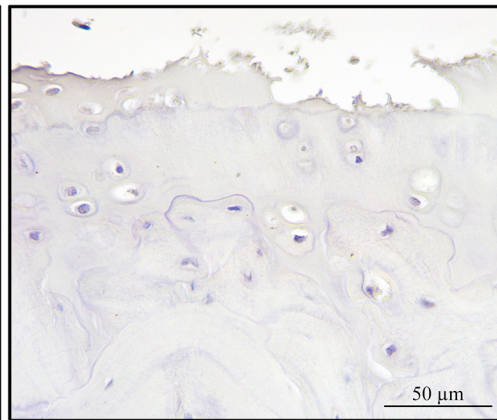

**Supplementary Figure 9.** Effect of miR-27b-3p inhibition on PPARG staining in articular cartilage of the medial tibial plateau after DMM surgery. Either miR-27b-3p inhibitor (Inh) or control inhibitor (Ctrl I) were intra-articularly injected (5  $\mu$ g each) 1 week and 3 weeks after DMM surgery. Mouse knees were collected 5 weeks after surgery for tissue processing and PPARG immunohistochemistry (IHC). Nuclei are visualized with hematoxylin. Negative control was processed for IHC but with omission of PPARG primary antibody.
