# Supplementary material for: Contribution of MicroRNA‐27b‐3p to Synovial Fibrotic Responses in Knee Osteoarthritis
Source: PubMed Central journal article supplement — Arthritis Rheumatol. 2022 Nov 11;74(12):1928–42. doi: 10.1002/art.42285 (PMC10946865; doi:10.1002/art.42285), 2022-11-11
Supplement: ART-74-1928-s015.pdf [file ART-74-1928-s015.pdf]

**Supplementary Table 2.** Primers used for RT-qPCR.

| <b>Gene</b>    | <b>Primer Sequence (5' to 3')</b>                                  |
|----------------|--------------------------------------------------------------------|
| <b>ADAMTS8</b> | Forward: AACAAAAGCTGCTCCGTGAT<br>Reverse: TCTGGTTCAGGTGGACGAAC     |
| <b>PPARG</b>   | Forward: ACCAAAGTGCAATCAAAGTGGA<br>Reverse: ATGAGGGAGTTGGAAGGCTCT  |
| <b>TSP1</b>    | Forward: AGCAGGGTGCTATTGTGAGG<br>Reverse: CCTTAGTGCTTTGGCCTCTG     |
| <b>COL14A1</b> | Forward: TCCGAGGAATGGTATAACCGG<br>Reverse: TGGACCAGGAACACTGACAGG   |
| <b>COL5A1</b>  | Forward: CCTGACAAGAAGTCCGAAGGG<br>Reverse: CGTCCACATAGGAGAGCAGTTT  |
| <b>HAS1</b>    | Forward: GGGTTATGCTACCAAGTACACC<br>Reverse: AGCCACTCACGGAAGTACGA   |
| <b>TNC</b>     | Forward: GGACCAAACCATCAGTGCC<br>Reverse: CCAGGAAACTGTGAACCCGT      |
| <b>CTNND1</b>  | Forward: AGGCAGAGCGTTACCAAGAG<br>Reverse: AGAACCACTCATCTTTGCCCT    |
| <b>COL1A1</b>  | Forward: GCTCGTGGAAATGATGGTGC<br>Reverse: ACCCTGGGGACCTTCAGAG      |
| <b>FN1</b>     | Forward: CCATCGCAAACCGCTGCCAT<br>Reverse: AACACTTCTCAGCTATGGGCTT   |
| <b>ITGA2</b>   | Forward: GGAACGGGACTTTCGCAT<br>Reverse: TCATCAGGGGAATCGTAACAGT     |
| <b>B-ACTIN</b> | Forward: AGAGCTACGAGCTGCCTGAC<br>Reverse: AGCACTGTGTTGGCGTACAG     |
| <b>GAPDH</b>   | Forward: GGAGCGAGATCCCTCCAAAAT<br>Reverse: GGCTGTTGTCATACTTCTCATGG |
